# Supplementary material
Source: MDPI journal article supplement (https://www.mdpi.com/2073-4352/11/9/1096)
Supplement: s1 [file s1]

Table S1. The detailed EDS results of CrFeMoNbTiW HEA coatings (in at. %).

| Annealing temperature | Region | Spot number | Fe    | Mo    | Cr    | Ti    | W     | Nb    | C    |
|-----------------------|--------|-------------|-------|-------|-------|-------|-------|-------|------|
| As-deposit            | DR     | 1           | 36.59 | 10.11 | 11.11 | 13.87 | 11.02 | 14.97 | -    |
|                       |        | 2           | 35.94 | 10.24 | 10.94 | 14.10 | 12.31 | 16.14 | -    |
|                       |        | 3           | 35.84 | 10.94 | 11.99 | 14.56 | 11.64 | 15.27 | -    |
|                       |        | 4           | 35.26 | 10.86 | 12.56 | 14.26 | 11.91 | 15.94 | -    |
|                       |        | 5           | 35.62 | 11.30 | 12.70 | 14.31 | 11.92 | 15.78 | -    |
|                       |        | Va          | 35.85 | 10.69 | 11.86 | 14.22 | 11.76 | 15.62 | -    |
|                       |        | Std         | 0.44  | 0.45  | 0.72  | 0.23  | 0.43  | 0.43  | -    |
|                       | ID     | P           | 1.2%  | 4.2%  | 6.1%  | 1.6%  | 3.6%  | 2.8%  | -    |
|                       |        | 6           | 24.94 | 12.64 | 14.09 | 17.62 | 14.56 | 18.64 | 3.56 |
|                       |        | 7           | 25.06 | 11.67 | 13.26 | 18.42 | 15.42 | 16.42 | 2.33 |
|                       |        | 8           | 24.10 | 10.94 | 14.37 | 15.46 | 11.23 | 18.11 | 2.15 |
|                       |        | 9           | 23.56 | 10.54 | 13.56 | 14.31 | 12.43 | 15.22 | 2.69 |
|                       |        | 10          | 25.29 | 10.26 | 12.77 | 15.89 | 14.91 | 20.71 | 2.87 |
|                       |        | Va          | 24.59 | 11.21 | 13.61 | 16.34 | 13.71 | 17.82 | 2.72 |
| Std                   | 0.65   | 0.86        | 0.57  | 1.49  | 1.60  | 1.89  | 0.49  |       |      |
| P                     | 2.7%   | 7.7%        | 4.2%  | 9.1%  | 11.7% | 10.6% | 18.1% |       |      |
| Annealed at 800 °C    | DR     | 11          | 35.94 | 8.21  | 8.84  | 17.64 | 12.66 | 16.69 | -    |
|                       |        | 12          | 34.75 | 9.48  | 9.56  | 13.56 | 11.55 | 17.85 | -    |
|                       |        | 13          | 35.69 | 11.06 | 11.84 | 16.58 | 9.87  | 16.11 | -    |
|                       |        | 14          | 34.12 | 10.65 | 12.56 | 14.33 | 11.91 | 17.33 | -    |
|                       |        | 15          | 32.95 | 10.85 | 13.05 | 15.94 | 13.16 | 15.27 | -    |
|                       |        | Va          | 34.69 | 10.05 | 11.17 | 15.61 | 11.83 | 16.65 | -    |
|                       |        | Std         | 1.09  | 1.07  | 1.67  | 1.48  | 1.13  | 0.91  | -    |
|                       | ID     | P           | 3.1%  | 10.7% | 14.9% | 9.5%  | 9.6%  | 5.4%  | -    |
|                       |        | 16          | 26.84 | 10.66 | 15.22 | 18.55 | 9.64  | 18.96 | 2.59 |
|                       |        | 17          | 25.12 | 11.33 | 14.99 | 17.99 | 9.88  | 15.48 | 2.11 |
|                       |        | 18          | 26.48 | 12.28 | 13.64 | 15.88 | 11.17 | 22.15 | 3.58 |
|                       |        | 19          | 24.99 | 11.42 | 12.67 | 16.54 | 11.58 | 16.48 | 2.69 |
|                       |        | 20          | 24.97 | 12.41 | 14.08 | 18.49 | 8.18  | 17.38 | 3.58 |
|                       |        | Va          | 25.68 | 11.62 | 14.12 | 17.49 | 10.09 | 18.09 | 2.91 |
| Std                   | 0.81   | 0.65        | 0.93  | 1.08  | 1.21  | 2.33  | 0.58  |       |      |
| P                     | 3.2%   | 5.6%        | 6.6%  | 6.2%  | 12.0% | 12.9% | 20.0% |       |      |
| Annealed at 900 °C    | DR     | 21          | 33.96 | 9.87  | 12.05 | 14.59 | 11.56 | 19.45 | -    |
|                       |        | 22          | 29.56 | 9.56  | 11.56 | 15.84 | 11.48 | 17.44 | -    |
|                       |        | 23          | 31.59 | 10.94 | 12.59 | 16.49 | 13.48 | 16.22 | -    |
|                       |        | 24          | 29.41 | 11.23 | 13.48 | 16.07 | 13.09 | 15.46 | -    |
|                       |        | 25          | 31.53 | 11.20 | 13.97 | 15.26 | 13.99 | 17.08 | -    |
|                       |        | Va          | 31.21 | 10.56 | 12.73 | 15.65 | 12.72 | 17.13 | -    |
|                       |        | Std         | 1.66  | 0.70  | 0.89  | 0.66  | 1.02  | 1.35  | -    |
|                       | ID     | P           | 5.3%  | 6.7%  | 7.0%  | 4.2%  | 8.0%  | 7.9%  | -    |
|                       |        | 26          | 23.59 | 9.88  | 14.23 | 15.99 | 12.64 | 18.96 | 5.61 |
|                       |        | 27          | 22.12 | 10.33 | 13.94 | 17.48 | 12.06 | 20.46 | 4.33 |
|                       |        | 28          | 21.46 | 10.96 | 15.94 | 14.94 | 14.31 | 19.99 | 3.96 |
|                       |        | 29          | 20.13 | 11.48 | 13.46 | 16.99 | 13.46 | 16.48 | 4.64 |
|                       |        | 30          | 20.60 | 12.45 | 14.13 | 16.40 | 13.43 | 20.16 | 3.01 |
|                       |        | Va          | 21.58 | 11.02 | 14.34 | 16.36 | 13.18 | 19.21 | 4.31 |
| Std                   | 1.22   | 0.90        | 0.84  | 0.87  | 0.77  | 1.46  | 0.85  |       |      |
| P                     | 5.6%   | 8.2%        | 5.9%  | 5.3%  | 5.8%  | 7.6%  | 19.7% |       |      |

|                     |    |     |       |       |       |       |       |       |       |
|---------------------|----|-----|-------|-------|-------|-------|-------|-------|-------|
| Annealed at 1000 °C | DR | 31  | 31.59 | 9.88  | 11.56 | 14.98 | 11.69 | 17.66 | -     |
|                     |    | 32  | 30.94 | 10.68 | 12.64 | 15.82 | 13.28 | 18.43 | -     |
|                     |    | 33  | 29.58 | 11.64 | 13.99 | 16.44 | 13.85 | 16.44 | -     |
|                     |    | 34  | 29.69 | 13.49 | 12.56 | 16.01 | 11.91 | 17.68 | -     |
|                     |    | 35  | 28.50 | 12.36 | 13.50 | 16.05 | 10.07 | 17.34 | -     |
|                     |    | Va  | 30.06 | 11.61 | 12.85 | 15.86 | 12.16 | 17.51 | -     |
|                     |    | Std | 1.09  | 1.26  | 0.84  | 0.48  | 1.32  | 0.64  | -     |
|                     |    | P   | 3.6%  | 10.9% | 6.5%  | 3.1%  | 10.9% | 3.7%  | -     |
|                     | ID | 36  | 23.88 | 10.66 | 12.58 | 16.73 | 13.04 | 17.98 | 2.99  |
|                     |    | 37  | 23.67 | 11.97 | 13.45 | 17.99 | 13.96 | 16.79 | 3.86  |
|                     |    | 38  | 22.16 | 13.46 | 13.11 | 17.56 | 11.68 | 19.48 | 3.41  |
|                     |    | 39  | 21.03 | 12.96 | 12.97 | 17.11 | 13.45 | 19.77 | 2.97  |
|                     |    | 40  | 19.81 | 12.00 | 14.44 | 16.71 | 13.02 | 20.78 | 2.57  |
|                     |    | Va  | 22.11 | 12.21 | 13.31 | 17.22 | 13.03 | 18.96 | 3.16  |
|                     |    | Std | 1.55  | 0.96  | 0.63  | 0.49  | 0.76  | 1.41  | 0.44  |
|                     |    | P   | 7.0%  | 7.9%  | 4.7%  | 2.9%  | 5.8%  | 7.4%  | 13.9% |

Table.S1 show the detailed EDS results of CrFeMoNbTiW HEA coatings (in at. %), where Va, Std and P represents the average value, the standard deviation value and the ratios of Std/Va of each area at different annealing temperature, respectively. as shown in Table. S1, most of P values are smaller than 10%. That suggests the element deviation is small and the average value could well represent the composition.
